# Supplementary material for: Analyzing the proximity to cover in a landscape of fear: a new approach applied to fine-scale habitat use by rabbits facing feral cat predation on Kerguelen archipelago
Source: PeerJ. 2016 Mar 7;4:e1769. doi: 10.7717/peerj.1769 (PMC4793317; doi:10.7717/peerj.1769)
Supplement: Supplemental Information 1 [file peerj-04-1769-s001.xlsx]

## Sheet: Feuil1
Patch number	Distance at the beginning	Angle at the beginning	Distance at the end	Angle at the end
19	30	281	23.5	268
	19.5	268	16	252
	20	252	23	208
	27	208	27.5	196
	26.5	196	25.5	154
	17.5	154	15	59
	30.5	59	31.5	1
	9	1	16	296
	34	296	27	281
9	4.5	126	27	73
	23.5	73	29.5	16
	48	16	28.5	2
	33	2	33	328
	47.5	328	49	318
	15.5	318	15.5	306
	10	306	4.5	256
	8	256	11.5	215
	8	215	9	126
30	13.5	101	18.5	24
	24.5	24	26.5	351
	29	351	31	315
	43	315	36	269
	25.5	269	27.5	232
	30.5	232	23.5	171
	32	171	25.5	144
	10.5	144	8.5	101
10	13.5	112	14.5	109
	27	109	26	102
	83.5	102	87	94
	29.5	94	15.5	65
	9	65	13.5	22
	22	22	12.5	322
	16.5	322	8	293
	5.5	293	4.5	269
	18.5	269	22	249
	10	249	11	244
	5.5	244	3	131
	11	131	13.5	112
28	82.5	114	85	69
	28	69	30	67
	78	67	94	47
	20	47	30	27
	12.5	27	8	13
	30	13	24	356
	10	356	13	339
	20.5	339	36.5	336
	37.5	336	35	334
	11	334	10.5	294
	18	294	19.5	274
	10.5	274	11.5	238
	15	238	8.5	182
	74.5	182	64.5	114
11	10.5	173	27	120
	20	120	20	353
	62	353	89	319
	75	319	79.5	297
	60	297	69.5	271
	75	271	61.5	229
	26.5	229	10.5	173
20	85	202	57	136
	47	136	13.5	338
	107	338	83.5	282
	45.5	282	80.5	202
27	6	127	6.5	104
	8.5	104	19	303
	111.5	303	104.5	286
	66.5	286	43.5	216
	48	216	34.5	144
	22.5	144	16	127
18	69	229	9	79
	1.5	79	1.5	25
	7	25	16	314
	42	314	52	307
	136	307	72	278
	63	278	68	229
8	79	182	77.5	101
	69	101	46	90
	14	90	15.5	71
	51	71	45	40
	83	40	65	23
	121	23	110	353
	13	353	9.5	345
	60.5	345	57	291
	8	291	7.5	248
	30	248	65	182
7	54	190	71.5	87
	62	87	44.5	11
	80	11	68	0
	24.5	0	15.5	335
	40	335	34	325
	72	325	50	305
	42	305	42	285
	18	285	15	205
	8	205	8.5	204
	50	204	55	190
21	57	214	46.5	115
	38.5	115	34.5	339
	124	339	94.5	298
	27.5	298	30	288
	54.5	288	47	256
	33	256	35	239
	40	239	53	214
6	18.5	245	17	220
	14	220	26.5	74
	47	74	64.5	21
	11.5	21	11	18
	67	18	81	345
	90	345	128	328
	68	328	110	320
	128	320	80	305
	54	305	28	245
26	2	247	2	174
	5.5	174	13.5	89
	16	89	15.5	42
	22.5	42	66	324
	161	324	179	307
	67	307	66	300
	157	300	112	294
	84	294	294	247
22	2	178	1	126
	2	126	2	99
	11	99	14	75
	67	75	63	64
	21.5	64	21	60
	15.5	60	11.5	9
	8	9	5	263
	12.5	263	10.5	246
	12	246	12	236
	7.5	236	4	195
	7.5	195	6	178
12	5	209	4.5	179
	7	179	7	167
	4	167	4	147
	10.5	147	14	124
	3	124	6	96
	6.5	96	7	82
	65	82	71.5	51
	27	51	16	1
	36.5	1	33	356
	15	356	14	347
	7.5	347	8	324
	16.5	324	21	314
	3	314	7	230
	11	230	15	209
13	5	201	6	146
	20.5	146	20.5	76
	11.5	76	10	35
	20	35	22	23
	33	23	34	345
	111	345	120	319
	49	319	44	292
	34	292	41.5	271
	56	271	58	264
	14.5	264	17.5	238
	34	238	41.5	201
14	4.5	189	6	124
	4	124	5	93
	7	93	7	79
	5	79	4	1
	6.5	1	7.5	298
	30	298	33	294
	13	294	11.5	267
	7.5	267	8.5	245
	5	245	7.5	189
31	9	218	4.5	117
	9	117	11.5	74
	5.5	74	4	336
	14.5	336	21	304
	14	304	23	278
	6	278	6	247
	13.5	247	13	237
	9.5	237	9	225
	15	225	14	218
15	11.5	188	16.5	51
	25.5	51	30	41
	41.5	41	42	28
	24.5	28	21.5	341
	20.5	341	24	320
	15.5	320	11	292
	5	292	7	202
	15	202	22	188
23	13	208	11	167
	21.5	167	22	146
	29.5	146	30.5	137
	14.5	137	5	9
	9.5	9	10.5	4
	18.5	4	18	342
	11	342	10.5	324
	4	324	4.5	291
	13.5	291	9.5	276
	6.5	276	8	208
5	5	165	7.5	109
	12	109	8	64
	4.5	64	3	7
	23	7	12.5	346
	4.5	346	7	294
	11.5	294	8	265
	19	265	12	256
	6	256	5.5	224
	6	224	8	165
32	7	252	3	166
	57	166	57	144
	10	144	14	29
	8	29	8	311
	70	311	21	277
	16	277	15.5	269
	19	269	15.5	252
29	25.5	166	17	81
	2	81	7.5	347
	11	347	15.5	313
	12	313	6.5	286
	5.5	286	3	201
	48	201	70	187
	51	187	45	166
4	51	182	26.5	124
	11.5	124	19.5	38
	28.5	38	24	339
	15	339	9	315
	13.5	315	13.5	304
	7.5	304	11.5	277
	25	277	40	182
24	15.5	196	10.5	66
	12.5	66	11	331
	44	331	30	287
	41	287	26.5	217
	14.5	217	14.5	214
	33.5	214	31	196
2	13	225	8.5	203
	13	203	20	170
	9.5	170	10	97
	15.5	97	15.5	87
	11	87	9	44
	12	44	11.5	29
	10.5	29	10.5	5
	13.5	5	13	347
	6	347	13	320
	62	320	40	272
	14.5	272	10	225
25	1	196	4	93
	8	93	5	66
	1	66	5	313
	70	313	43	303
	10.5	303	14	287
	27	287	25	279
	8.5	279	11	259
	5	259	4.5	196
1	62	98	51	289
	horizon	289	horizon	98
16	5.5	175	4	14
	1	14	1	328
	4.5	328	5	301
	1	301	1	229
	6.5	229	6	175
17	8.5	186	11.5	126
	9	126	11.5	94
	6.5	94	6.5	344
	7.5	344	15	296
	11	296	12.5	277
	32	277	20	271
	4	271	6	262
	11.5	262	13	245
	6	245	10	186
3	1	168	1	118
	4	118	5	84
	4	84	4.5	39
	6.5	39	5.5	355
	1	355	1	297
	6	297	5.5	260
	1	260	1	218
	7.5	218	6	168
