# Supplementary material for: Analyzing the proximity to cover in a landscape of fear: a new approach applied to fine-scale habitat use by rabbits facing feral cat predation on Kerguelen archipelago
Source: PeerJ. 2016 Mar 7;4:e1769. doi: 10.7717/peerj.1769 (PMC4793317; doi:10.7717/peerj.1769)
Supplement: Supplemental Information 3 [file peerj-04-1769-s003.xlsx]

## Sheet: lapin2
patch	Y	X	pellets	closestcover	burrows010	burrows1020	closestburrow	npellets	dryweight	isolation	domainofsafety	distancecorners	ncorners	closestcorner
1	-49.38135498	70.43713102	oui	9	0	5	11	11	0.9	0.29	1247.862444	NA	0	NA
2	-49.38140603	70.436624	non	7	2	0	7	0	0	0.63	591.4672444	11.975	20	6
3	-49.38094997	70.43706397	oui	1	1	0	2	19	1.2	0.88	52.68046786	3.78125	16	1
4	-49.38126898	70.43600198	oui	6	1	1	9	1	0.1	0.08	1203.158388	15	10	7.5
5	-49.38129497	70.43554097	oui	3	0	7	13	30	2.4	0.67	188.5236231	9.05555555555556	18	3
6	-49.38130301	70.43366401	oui	5	0	4	11	77	7.3	0.5	1187.738564	14.4	5	11
7	-49.38127703	70.43313403	oui	9	0	0	NA	136	13	0.67	1599.142165	14.9166666666667	6	8
8	-49.38130301	70.43267302	oui	9	2	1	9	105	9.3	0.38	1646.082669	11.25	6	7.5
9	-49.38120897	70.42993901	oui	3	0	0	NA	32	3.8	0.42	750.4331258	11.7222222222222	10	4.5
10	-49.38099397	70.43165202	oui	3	0	1	20	46	5.2	0.58	496.6393937	11.9117647058824	17	3
11	-49.38063196	70.43260697	oui	5	2	1	6	53	5.6	0.21	1063.297638	20	2	10.5
12	-49.38093698	70.43419903	oui	4	0	2	20	26	2.3	0.79	510.4695132	9.23913043478261	23	3
13	-49.38047396	70.43427397	oui	5	0	2	11	303	30	0.54	1199.670508	14.75	10	5
14	-49.38050497	70.43482298	oui	2	0	1	12	4	0.4	0.79	138.0498275	6.84375	16	4
15	-49.38089197	70.43507997	oui	5	0	0	NA	63	6.5	0.54	568.3684947	16.6	12	5
16	-49.38059298	70.43729698	non	1	2	0	7	0	0	0.71	25.29967237	3.55	10	1
17	-49.38131802	70.43434303	oui	5	0	0	NA	44	4.8	0.92	232.4406806	10	17	4
18	-49.38080303	70.433589	oui	2	1	0	4	96	8	0.71	615.874281	7	5	1.5
19	-49.38106799	70.42974296	oui	4	0	0	NA	94	11.6	0.75	1154.772034	17.7222222222222	9	9
20	-49.38089901	70.43294099	oui	7	0	3	14	204	21.1	0.67	1199.97637	13.5	1	13.5
21	-49.38101401	70.43322204	oui	14	0	0	NA	123	10.5	0.71	1627.740313	NA	0	NA
22	-49.38080697	70.43392402	oui	1	0	1	18	7	0.6	0.83	245.3551087	9.325	20	1
23	-49.38113504	70.43540502	non	3	1	2	8	0	0	0.75	339.4849404	11.7222222222222	18	4
24	-49.38126597	70.43630197	non	6	1	2	10	0	0	0.25	856.2753859	13.0833333333333	6	10.5
25	-49.38143997	70.43690697	non	1	1	0	5	0	0	0.96	157.7771934	7.88461538461539	13	1
26	-49.38101602	70.43380701	oui	2	0	0	NA	84	8.3	0.71	945.909038	11	7	2
27	-49.38081502	70.43325598	oui	8	0	1	10	28	2.6	1	953.7462644	13.0833333333333	6	6
28	-49.38096698	70.43193198	oui	2	1	0	8	36	3.4	0.5	1165.553738	13.7857142857143	15	8
29	-49.38119397	70.43578296	oui	3	1	1	6	16	0.6	0.58	487.8093172	8.88888888888889	9	2
30	-49.38110503	70.43106001	oui	4	1	0	9	79	7.3	0.71	1417.60952	16.75	6	8.5
31	-49.38057203	70.43513697	oui	3	1	0	5	38	3.9	0.63	263.5150957	11.2222222222222	18	4
32	-49.38137803	70.43573803	non	3	3	0	8	0	0	0.58	462.9503049	12.4545454545455	11	3
